# Supplementary material for: Photo-crosslinked coatings based on 2-hydroxypropyl acrylamide for the prevention of biofouling
Source: Royal Society of Chemistry journal article supplement (doi:10.1039/c9tb00044e), 2019-01-01
Supplement: c9tb00044e1.pdf [file c9tb00044e1.pdf]

*Electronic Supplementary Information (ESI)*

**Photo-crosslinked coatings based on 2-hydroxypropyl acrylamide for the prevention of biofouling**

Chiaki Yoshikawa,<sup>\*a,b</sup> Bahman Delalat,<sup>b,c</sup> Fei Huang,<sup>b,d</sup> Susanne Braun,<sup>b,c</sup> Nanami Nishijima,<sup>a,f</sup> Nicolas H. Voelcker,<sup>b,c</sup> Peter Kingshott,<sup>d</sup> Helmut Thissen<sup>b\*</sup>

<sup>a</sup>WPI-MANA, National Institute for Materials Science, Tsukuba, Ibaraki 305-0047, Japan.

<sup>b</sup>CSIRO Manufacturing, Research Way, Clayton, Victoria 3168, Australia.

<sup>c</sup>Monash Institute of Pharmaceutical Sciences, Monash University, Parkville, Victoria 3052, Australia.

<sup>d</sup>Department of Chemistry and Biotechnology, Swinburne University of Technology, Hawthorn, Victoria 3122, Australia.

<sup>e</sup>RWTH Aachen University, Templergraben 55, 52062 Aachen, Germany.

<sup>f</sup>Graduate School of Science and Engineering, University of Toyama, Toyama 930-8555, Japan.

## Supporting Results

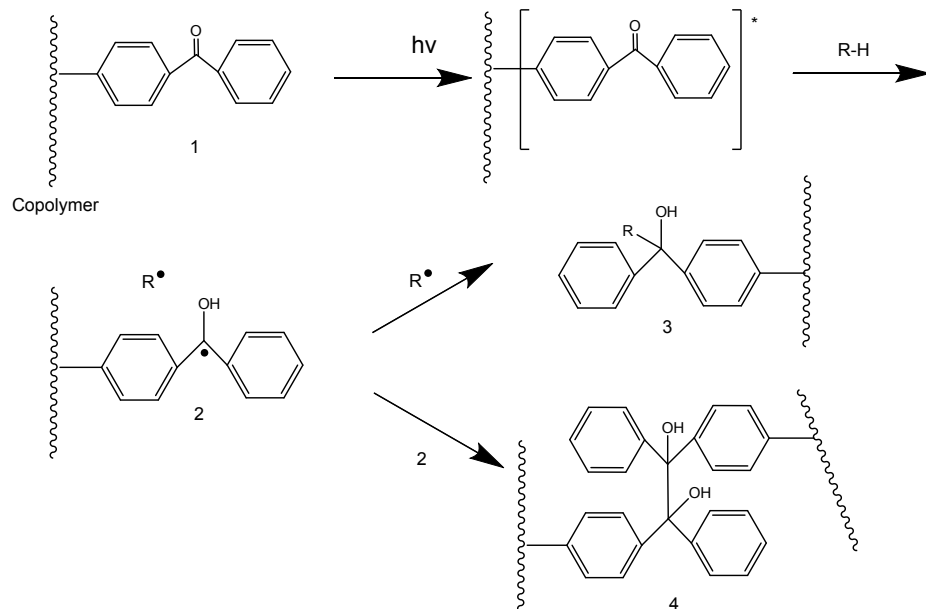

**Scheme S1.** Radical reaction pathways of benzophenone containing copolymers.

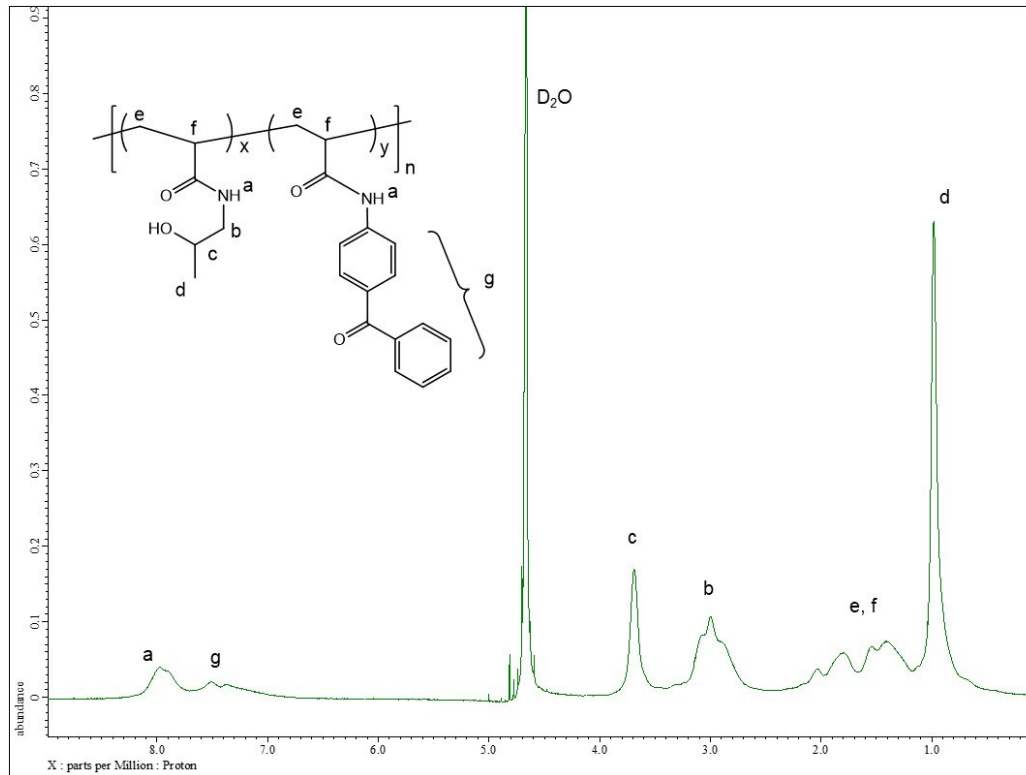

**Figure S1.**  $^1\text{H}$  NMR spectrum of poly(HPA<sub>95</sub>-*r*-BPA<sub>5</sub>).

(a)

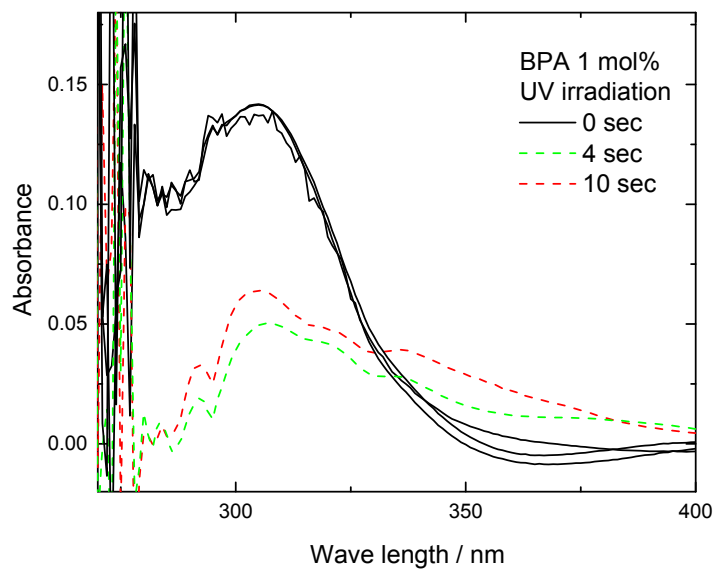

(b)

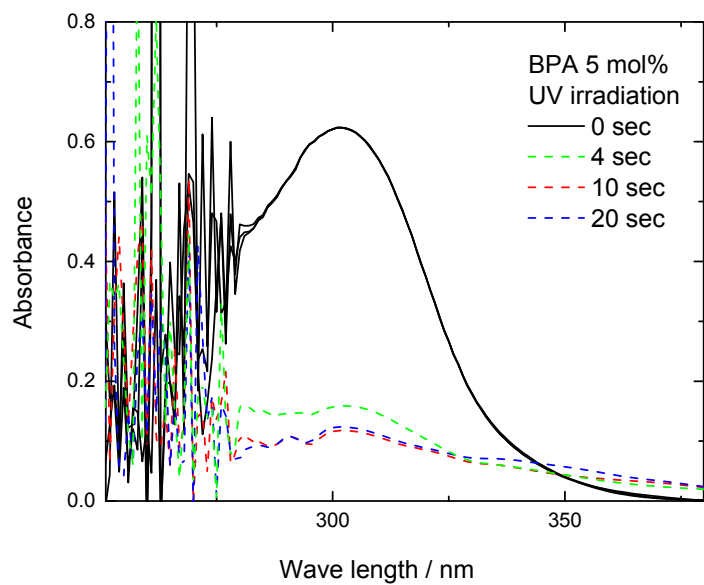

**Figure S2.** UV-VIS spectra where the BPA content in the copolymer was (a) 1 mol% and (b) 5 mol%.

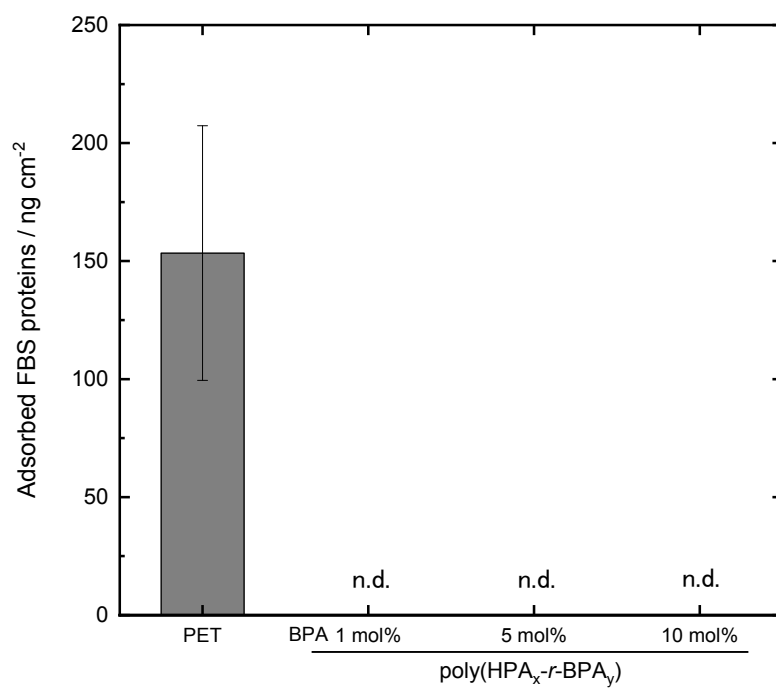

**Figure S3.** Amount of adsorbed FBS proteins on coatings prepared on PET films.

**Table S1.** Dry thicknesses of coatings on silicon wafers before and after EtOH washing.

| <b>BPA content</b> | <b>Dry thickness / nm</b> |              |
|--------------------|---------------------------|--------------|
|                    | <b>Before</b>             | <b>After</b> |
| 1 mol%             | 87 ± 6                    | 84 ± 30      |
| 5 mol%             | 138 ± 10                  | 135 ± 19     |
| 10 mol%            | 137 ± 9                   | 125 ± 12     |

**Table S2.** Dry thicknesses of coatings on silicon wafers before and after incubation in PBS.\*

| <b>BPA content</b> | <b>Dry thickness / nm</b> |              |
|--------------------|---------------------------|--------------|
|                    | <b>Before</b>             | <b>After</b> |
| 1 mol%             | 138 ± 0.4                 | 136 ± 1.5    |
| 5 mol%             | 115 ± 8.7                 | 118 ± 19     |
| 10 mol%            | 156 ± 4.2                 | 158 ± 3.7    |

\*The coatings prepared on silicon wafers were incubated in PBS at 25 °C for 24 h and then washed with water. The thickness was measured by an ellipsometer. The data obtained from two independent samples were averaged.

**Table S3.** The wettability of coatings prepared on PET films\*.

| <b>BPA content</b> | <b>Contact angle / degree</b> |
|--------------------|-------------------------------|
| 1 mol%             | 42 ± 0.4                      |
| 5 mol%             | 42 ± 0.8                      |
| 10 mol%            | 45 ± 1.5                      |

\*Pristine PET film: 67 ± 2.0 degree
